## Retraction: Colon cancer-induced interleukin-35 inhibits beta-catenin-mediated pro-oncogenic activity

Yueqiang Jiang<sup>1,\*</sup>, Yanling Ma<sup>2,\*</sup>, RuiChao Li<sup>1</sup> and JianHai Sun<sup>2</sup>

<sup>1</sup>Department of Gerontology, Tongji Hospital, Tongji Medical College, Huazhong University of Science and Technology, Wuhan, Hubei Province, China

<sup>2</sup>Department of Oncology, the Third People's Hospital, Wuhan, Hubei Province, China

\*Co-first author

**Published:** December 17, 2022

**Copyright:** © 2022 Jiang et al. This is an open access article distributed under the terms of the [Creative Commons Attribution License](#) (CC BY 3.0), which permits unrestricted use, distribution, and reproduction in any medium, provided the original author and source are credited.

**This article has been retracted:** During its investigation, Oncotarget requested the original data for this paper from the authors. The authors state: “After investigation, we determined that some original data were lost and we cannot repeat the results, making data interpretation difficult and conclusion unreliable.” All authors have therefore agreed to the retraction of this paper from Oncotarget.

Original article: Oncotarget. 2018; 9:11989–11998. <https://doi.org/10.18632/oncotarget.22857>
